# Supplementary material
Source: MDPI journal article supplement (https://www.mdpi.com/2311-5629/7/3/66)
Supplement: s1 [file s1]

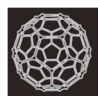

## Supplementary Material

# Conformational Analysis of [60]PCBM from DFT Simulations of Electronic Energies, Bond Strain and the $^{13}\text{C}$ NMR Spectrum: Input Geometry Determination and Ester Bond Rotation Dynamics

Tong Liu <sup>1</sup> and T. John S. Dennis <sup>2,3,\*</sup>

<sup>1</sup> School of Physics and Astronomy, Queen Mary University of London, London E1 4NS, UK; t.liu@qmul.ac.uk

<sup>2</sup> MOE Key Laboratory of Macromolecular Synthesis and Functionalization, Department of Polymer Science and Engineering, Zhejiang University, Hangzhou 310027, Zhejiang, China.

<sup>3</sup> Haina-Carbon Nanostructure Research Center, Yangtze Delta Region Institute of Tsinghua University, Jiaxing 314006, Zhejiang, China.

\* Correspondence: j.dennis@zju.edu.cn

**Table S1.** The relevant bond angles for each of the 24 [60]PCBM conformers, their mean absolute difference from those of a powder XRD study (from Ref. 16 and given in parentheses) and their relative calculated total electronic energies. These values are plotted in Figure 3 of the paper.

| Conf.  | F1,C61,C4<br>(116.6°) | Ph1,C61,C4<br>(115.5°) | C61,C4,C3<br>(114.4°) | C4,C3,C2<br>(110.9°) | C3,C2,C1<br>(113.6°) | C2,C1,O<br>(110.8°) | C1,O,Me<br>(116.0°) | C2,C1=O<br>(125.0°) | O,C1=O<br>(123.3°) | MAD bond<br>angle | Relative<br>electr. en-<br>ergy<br>(kJ/mol) |
|--------|-----------------------|------------------------|-----------------------|----------------------|----------------------|---------------------|---------------------|---------------------|--------------------|-------------------|---------------------------------------------|
| aaa-aa | 124.2°                | 107.6°                 | 122.5°                | 110.9°               | 112.2°               | 111.6°              | 115.6°              | 125.6°              | 123.5°             | 2.9°              | 11.3                                        |
| aaa-sa | 124.2°                | 107.6°                 | 122.3°                | 110.3°               | 116.1°               | 112.6°              | 115.7°              | 124.0°              | 123.4°             | 3.4°              | 14.8                                        |
| aaa-as | 124.2°                | 107.6°                 | 122.4°                | 110.3°               | 111.8°               | 117.7°              | 121.4°              | 123.6°              | 118.6°             | 4.7°              | 41.0                                        |
| aaa-ss | 124.3°                | 107.6°                 | 122.1°                | 109.2°               | 124.5°               | 124.8°              | 126.9°              | 118.1°              | 117.1°             | 8.3°              | 67.3                                        |
| aas-aa | 125.2°                | 106.9°                 | 121.0°                | 117.3°               | 121.3°               | 108.8°              | 115.6°              | 128.6°              | 122.6°             | 5.2°              | 41.1                                        |
| aas-sa | 125.2°                | 106.7°                 | 121.2°                | 118.4°               | 126.0°               | 115.9°              | 115.6°              | 121.4°              | 122.7°             | 6.0°              | 50.0                                        |
| aas-as | 125.2°                | 106.8°                 | 120.7°                | 118.0°               | 121.0°               | 115.9°              | 122.8°              | 126.6°              | 117.5°             | 6.4°              | 72.7                                        |
| aas-ss | 125.2°                | 106.4°                 | 121.3°                | 122.9°               | 138.1°               | 129.9°              | 129.4°              | 114.3°              | 129.4°             | 12.3°             | 143.5                                       |
| asa-aa | 129.4°                | 103.3°                 | 135.5°                | 125.0°               | 111.7°               | 110.2°              | 115.7°              | 126.4°              | 123.4°             | 7.1°              | 84.8                                        |
| asa-sa | 129.4°                | 103.2°                 | 135.6°                | 124.6°               | 115.7°               | 113.6°              | 115.5°              | 123.2°              | 123.2°             | 7.5°              | 92.5                                        |
| asa-as | 129.2°                | 103.5°                 | 135.9°                | 125.7°               | 110.5°               | 117.3°              | 121.4°              | 124.1°              | 118.5°             | 8.8°              | 106.6                                       |
| asa-ss | 129.9°                | 102.7°                 | 135.7°                | 121.9°               | 125.0°               | 125.8°              | 126.6°              | 117.3°              | 116.9°             | 12.2°             | 153.7                                       |
| 0.0    |                       |                        |                       |                      |                      |                     |                     |                     |                    |                   |                                             |
| saa-aa | 116.7°                | 116.3°                 | 115.4°                | 110.7°               | 113.0°               | 110.8°              | 115.6°              | 125.7°              | 123.5°             | 0.6°              | 4.6                                         |
| saa-sa | 116.7°                | 116.2°                 | 115.4°                | 110.5°               | 116.8°               | 112.8°              | 115.5°              | 123.9°              | 123.3°             | 1.0°              | 29.3                                        |
| saa-as | 116.7°                | 116.3°                 | 115.4°                | 110.7°               | 112.4°               | 117.7°              | 121.5°              | 123.8°              | 121.5°             | 1.9°              | 59.2                                        |
| saa-ss | 116.9°                | 115.9°                 | 114.7°                | 110.1°               | 124.6°               | 124.8°              | 126.9°              | 118.2°              | 117.1°             | 5.7°              | 5.7°                                        |
| 25.5   |                       |                        |                       |                      |                      |                     |                     |                     |                    |                   |                                             |
| sas-aa | 116.2°                | 117.1°                 | 114.2°                | 117.6°               | 120.8°               | 108.9°              | 115.6°              | 128.5°              | 122.6°             | 2.8°              | 33.0                                        |
| sas-sa | 115.9°                | 117.3°                 | 114.7°                | 118.5°               | 125.5°               | 115.7°              | 115.9°              | 121.5°              | 122.8°             | 3.5°              | 57.6                                        |
| sas-as | 116.2°                | 117.2°                 | 113.9°                | 118.2°               | 120.6°               | 116.0°              | 122.8°              | 126.5°              | 117.5°             | 4.1°              | 124.3                                       |
| sas-ss | 115.8°                | 117.3°                 | 114.6°                | 123.0°               | 137.6°               | 129.9°              | 129.7°              | 114.3°              | 115.7°             | 10.1°             | 10.1°                                       |
| 43.8   |                       |                        |                       |                      |                      |                     |                     |                     |                    |                   |                                             |
| ssa-aa | 115.4°                | 120.0°                 | 125.3°                | 122.8°               | 111.2°               | 110.5°              | 115.6°              | 126.3°              | 123.2°             | 3.6°              | 50.3                                        |
| ssa-sa | 115.3°                | 120.1°                 | 125.4°                | 122.6°               | 115.3°               | 113.6°              | 115.5°              | 123.4°              | 123.0°             | 4.0°              | 67.3                                        |
| ssa-as | 115.3°                | 120.4°                 | 125.4°                | 122.4°               | 111.0°               | 117.1°              | 121.2°              | 124.4°              | 118.5°             | 5.1°              | 112.5                                       |
| ssa-ss | 115.1°                | 120.3°                 | 126.1°                | 121.3°               | 123.8°               | 125.9°              | 127.2°              | 117.5°              | 116.6°             | 8.9°              | 11.3                                        |
